# Supplementary material for: Systematically tuning the ΔESTand charge balance property of bipolar hosts for low operating voltage and high power efficiency solution-processed electrophosphorescent devices
Source: Royal Society of Chemistry journal article supplement (doi:10.1039/c5tc00691k), 2015-01-01
Supplement: c5tc00691k1.pdf [file c5tc00691k1.pdf]

## Supporting information

### **Systematic tuning the $\Delta E_{ST}$ and charge balance property of the bipolar host for low operating voltage and high power efficiency solution-processed electrophosphorescent devices**

Xinxin Ban<sup>a</sup>, Wei Jiang<sup>\*a</sup>, Kaiyong Sun<sup>a</sup>, Haiyong Yang<sup>a</sup>, Yanan Miao<sup>a</sup>, Fenghao Yang<sup>a</sup>, Yueming Sun<sup>\*a</sup>, Bin Huang<sup>a</sup>, Lian Duan<sup>\*b</sup>

#### **Content**

|                                                  |   |
|--------------------------------------------------|---|
| Solvent Effect on PL Emissions of the Hosts..... | 1 |
| PL Emissions in Film.....                        | 3 |
| AFM Images of xCz-nPBI.....                      | 3 |

To determine the change in dipole moment upon excitation, we used the Lippert-Mataga equation Eq. (1), which expressed the Stokes shift as a function of the solvent polarity parameter  $\Delta f(\epsilon, n)$ .

$$\Delta\nu = \nu_{abs} - \nu_f \cong \frac{2(\Delta\mu)^2}{hca^3} \Delta f(\epsilon, n) + A \quad (1)$$

and  $\Delta f(\epsilon, n)$  is calculated by

$$\Delta f(\epsilon, n) = \frac{\epsilon - 1}{2\epsilon + 1} - \frac{n^2 - 1}{2n^2 + 1} \quad (2)$$

Here,  $\Delta\nu = \nu_{abs} - \nu_f$  corresponds to the Stokes shift (in  $\text{cm}^{-1}$ ) between the maxima of absorption and fluorescence emission. Fig S1 shows the PL emission in different solvents. The other terms:  $h$ ,  $c$  and  $a$  respectively represent the Planck's constant, the velocity of light and the solute cavity radius.<sup>39</sup> In Eq. (2),  $n$  and  $\epsilon$  are refractive index and the static dielectric constant of the solvent, respectively. Table S1 and S2 list the  $\Delta\nu$  values for xCz-PBI and Cz-nPBI in different solvents. Fig. S2 shows the linear Lippert-Mataga plots with the slope values of 16124, 13186, 10626, 8263, 8075 and 6567  $\text{cm}^{-1}$  for 6Cz-PBI, 4Cz-PBI, 2Cz-PBI, Cz-2PBI, Cz-4PBI and Cz-6PBI, respectively.

**Table S1** Spectral properties of xCz-PBI in different solvents

| Solvents        | $\Delta f(\epsilon, n)$ | 2Cz-PBI                    |                        |                            | 4Cz-PBI                    |                        |                            | 6Cz-PBI                    |                        |                            |
|-----------------|-------------------------|----------------------------|------------------------|----------------------------|----------------------------|------------------------|----------------------------|----------------------------|------------------------|----------------------------|
|                 |                         | $\lambda_{abs}(\text{nm})$ | $\lambda_f(\text{nm})$ | $\Delta V(\text{cm}^{-1})$ | $\lambda_{abs}(\text{nm})$ | $\lambda_f(\text{nm})$ | $\Delta V(\text{cm}^{-1})$ | $\lambda_{abs}(\text{nm})$ | $\lambda_f(\text{nm})$ | $\Delta V(\text{cm}^{-1})$ |
| N-hexane        | 0.001                   | 342                        | 393                    | 3794                       | 349                        | 433                    | 5560                       | 346                        | 410                    | 4511                       |
| Tetrahydrofuran | 0.210                   | 342                        | 419                    | 5373                       | 347                        | 468                    | 7451                       | 345                        | 470                    | 7709                       |
| Dichloromethane | 0.218                   | 344                        | 435                    | 6081                       | 348                        | 484                    | 8074                       | 347                        | 476                    | 7810                       |
| Ethanol         | 0.289                   | 341                        | 454                    | 7299                       | 346                        | 511                    | 9332                       | 346                        | 506                    | 9138                       |

**Table S2** Spectral properties of Cz-nPBI in different solvents

| Solvents        | $\Delta f(\epsilon, n)$ | Cz-2PBI                    |                        |                            | Cz-4PBI                    |                        |                            | Cz-6PBI                    |                        |                            |
|-----------------|-------------------------|----------------------------|------------------------|----------------------------|----------------------------|------------------------|----------------------------|----------------------------|------------------------|----------------------------|
|                 |                         | $\lambda_{abs}(\text{nm})$ | $\lambda_f(\text{nm})$ | $\Delta V(\text{cm}^{-1})$ | $\lambda_{abs}(\text{nm})$ | $\lambda_f(\text{nm})$ | $\Delta V(\text{cm}^{-1})$ | $\lambda_{abs}(\text{nm})$ | $\lambda_f(\text{nm})$ | $\Delta V(\text{cm}^{-1})$ |
| N-hexane        | 0.001                   | 299                        | 390                    | 7804                       | 304                        | 390                    | 7250                       | 305                        | 379                    | 6401                       |
| Tetrahydrofuran | 0.210                   | 297                        | 403                    | 8856                       | 304                        | 399                    | 7832                       | 304                        | 401                    | 7957                       |
| Dichloromethane | 0.218                   | 297                        | 407                    | 9100                       | 301                        | 404                    | 8470                       | 304                        | 402                    | 8019                       |
| Ethanol         | 0.289                   | 297                        | 421                    | 9917                       | 301                        | 415                    | 9126                       | 303                        | 413                    | 8790                       |

<sup>a</sup>  $\Delta f$  is the orientation polarizability parameter of the solvent. <sup>b</sup>  $\lambda_{abs}$  is absorption wavelength. <sup>c</sup>  $\lambda_{abs}$  is fluorescent wavelength. <sup>d</sup>  $\Delta V$  is the Stokes shift between the maxima of absorption and fluorescence emission.

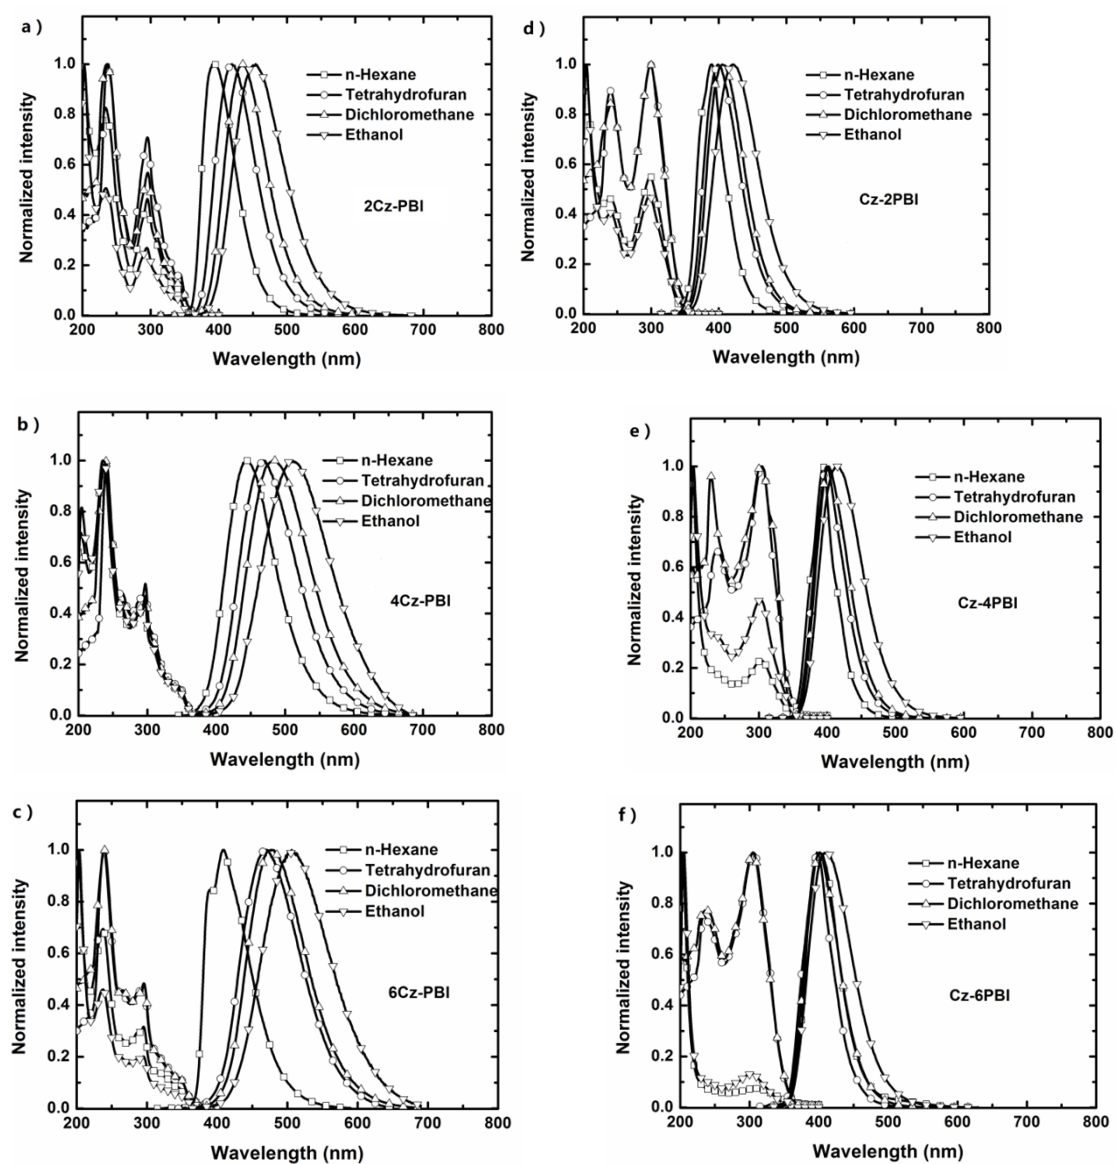

Figure S1. PL emissions of xCz-nPBI in different solvents.

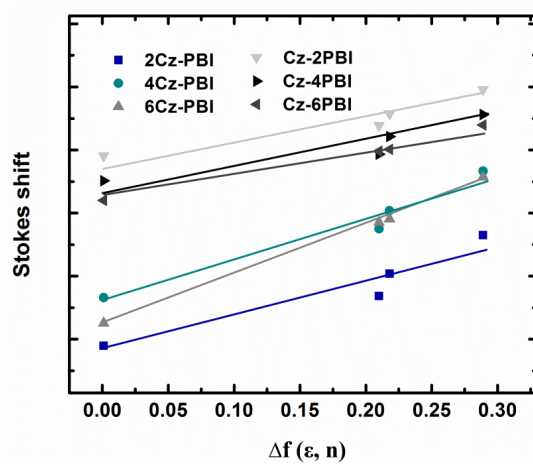

Figure S2. Lippert-Mataga plots of xCz-nPBI in various solutions.

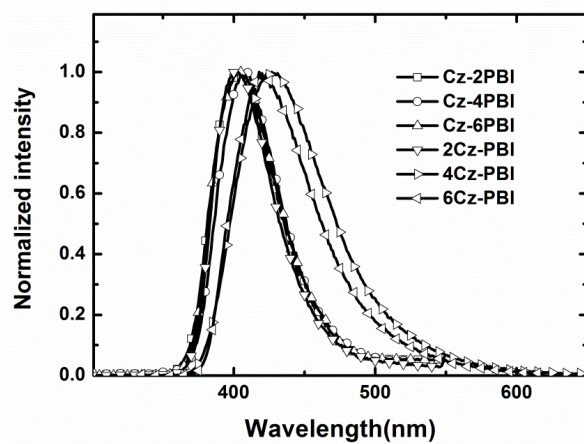

**Figure S3.** PL Emissions of xCz-nPBI in Film

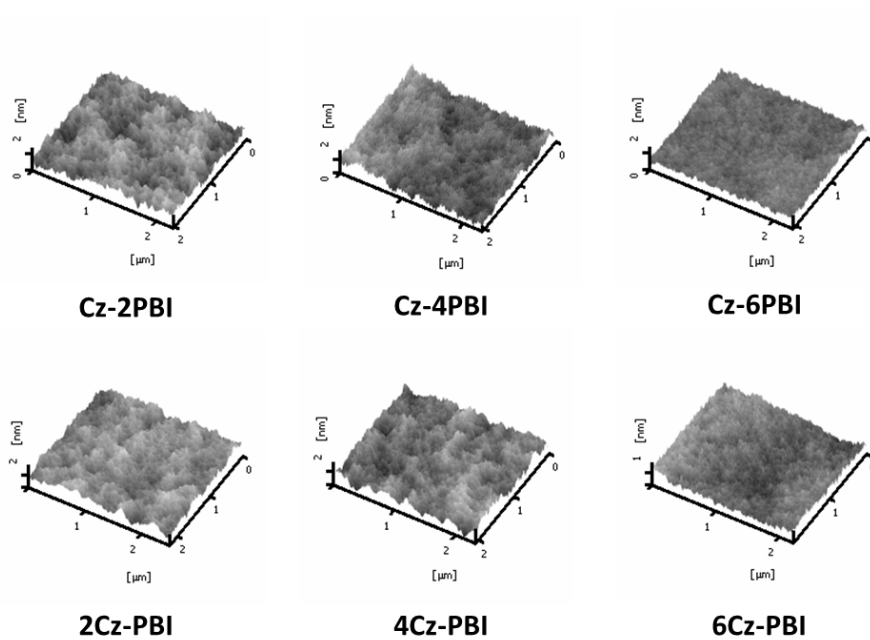

**Figure S4.** AFM Images of xCz-nPBI
